# Supplementary material for: Quantifying Fish Assemblages in Large, Offshore Marine Protected Areas: An Australian Case Study
Source: PubMed Central journal article supplement (PMC4215995; doi:10.1371/journal.pone.0110831), 2014-10-31
Supplement: pone.0110831.s001.pdf [file pone.0110831.s001.pdf]

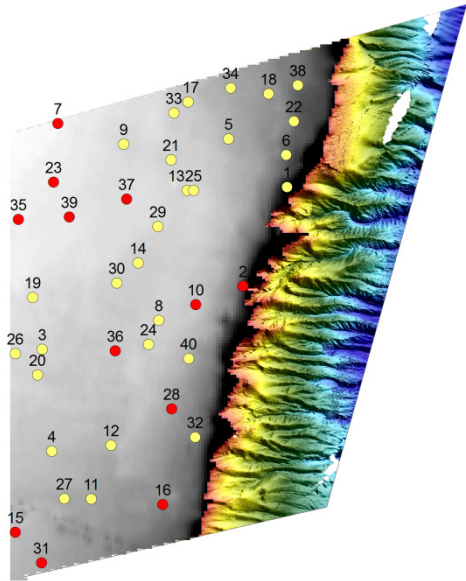

### Habitat Type

- Canyon
- Mixed
- Sediment

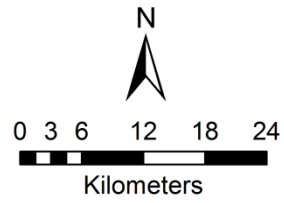

| Phase 1 GRTS Sample Site | Seabed Habitat Class | Depth (m) |
|--------------------------|----------------------|-----------|
| 1                        | Sediment             | 140       |
| 3                        | Sediment             | 59        |
| 4                        | Sediment             | 70        |
| 2                        | Mixed                | 160       |
| 7                        | Mixed                | 40        |
| 10                       | Mixed                | 65        |
| 15                       | Mixed                | 68        |
| 16                       | Mixed                | 98        |
| 23                       | Mixed                | 45        |
| 28                       | Mixed                | 83        |
| 31                       | Mixed                | 79        |
